# Supplementary material
Source: PubMed Central journal article supplement (PMC11000139)
Supplement: jama-e242396-s002.pdf [file jama-e242396-s002.pdf]

## Data Sharing Statement

Liu. Clinical Benefit and Regulatory Outcomes of Cancer Drugs Receiving Accelerated Approval. *JAMA*. Published April 07, 2024. doi:10.1001/jama.2024.2396

### Data

**Data available:** No

### Additional Information

**Explanation for why data not available:** Data was extracted from publicly-available FDA documents and peer-reviewed literature.
